# Correction: Analysis and identification of the Grem2 heparin/heparan sulfate-binding motif

Chandramohan Kattamuri, Kristof Nolan and Thomas B. Thompson

Volume 474 (7), pages 1093–1107

The surname of the author Thomas B. Thompson was spelled incorrectly when this article was first published. The online Version of Record was updated with the correct spelling on 15 March 2017. No other changes to the published article were made.

Downloaded from [http://port.silverchair.com/biochemj/article-pdf/474/7/1529/689386/bj-2016-1050\\_cor.pdf](http://port.silverchair.com/biochemj/article-pdf/474/7/1529/689386/bj-2016-1050_cor.pdf) by guest on 10 April 2024

Correction published:  
24 April 2017
